# Supplementary material for: The Erv41–Erv46 complex serves as a retrograde receptor to retrieve escaped ER proteins
Source: PubMed Central journal article supplement — J Cell Biol. 2015 Jan 19;208(2):197–209. doi: 10.1083/jcb.201408024 (PMC4298680; doi:10.1083/jcb.201408024), 2015-01-19
Supplement: supp_jcb.201408024_JCB_201408024_sm.pdf [file supp_jcb.201408024_JCB_201408024_sm.pdf]

Shibuya et al., <http://www.jcb.org/cgi/content/full/jcb.201408024/DC1>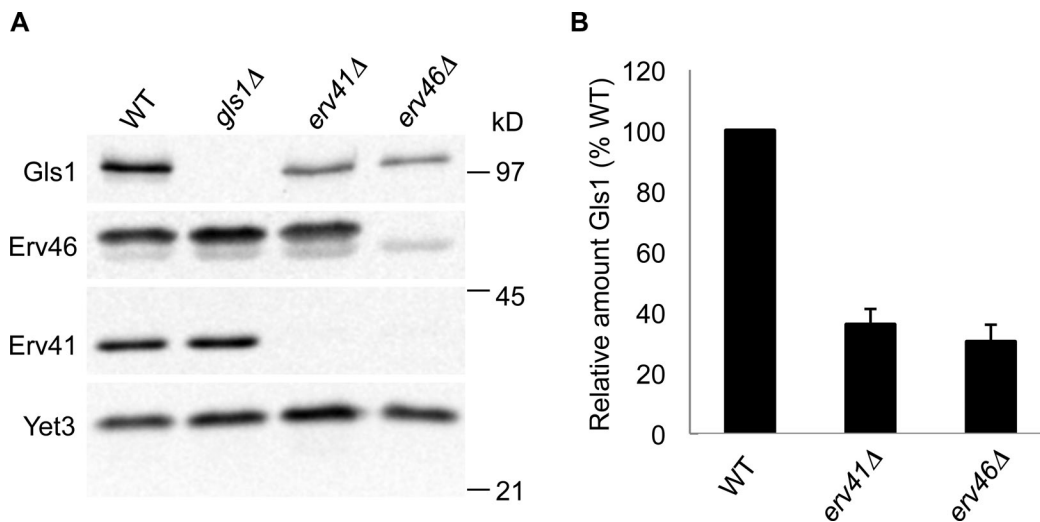

Figure S1. **The *erv46Δ* mutation reduces cellular levels of Gls1 similarly to *erv41Δ*.** (A) Cells grown to mid-log phase were lysed, resolved on a 10.5% polyacrylamide gel, and immunoblotted for Gls1, Erv46, Erv41, and Yet3 (loading control). WT (CBY740), *gls1Δ* (CBY1086), *erv41Δ* (CBY1168), and *erv46Δ* (CBY3612) strains were compared. The panel was assembled from a single immunoblot, and the molecular mass markers shown indicate relative positions across neighboring strips. (B) Relative amounts of Gls1 with standard error bars ( $n = 3$ ). Gls1 levels were normalized with Yet3 as the loading control and plotted as a percentage relative to WT.

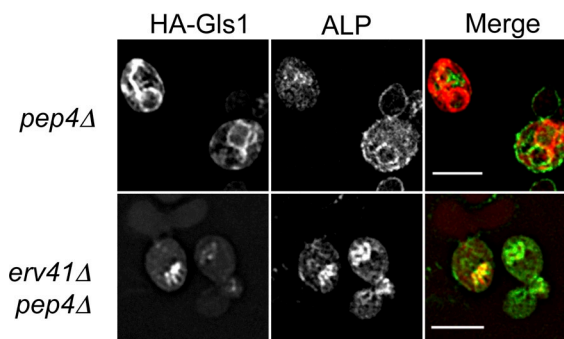

Figure S2. **Absence of Erv41 causes mislocalization of Gls1 to vacuoles.** Triple HA-tagged Gls1 was visualized by immunofluorescence microscopy using an anti-HA monoclonal antibody and an anti-mouse IgG Texas red-conjugated secondary antibody in *pep4Δ* (CBY3864) and *erv41Δ pep4Δ* (CBY3867) strains. The same cells were also stained for ALP as a vacuole marker using a polyclonal antibody against ALP and an anti-rabbit IgG FITC-conjugated secondary antibody. Bars, 5  $\mu$ m.

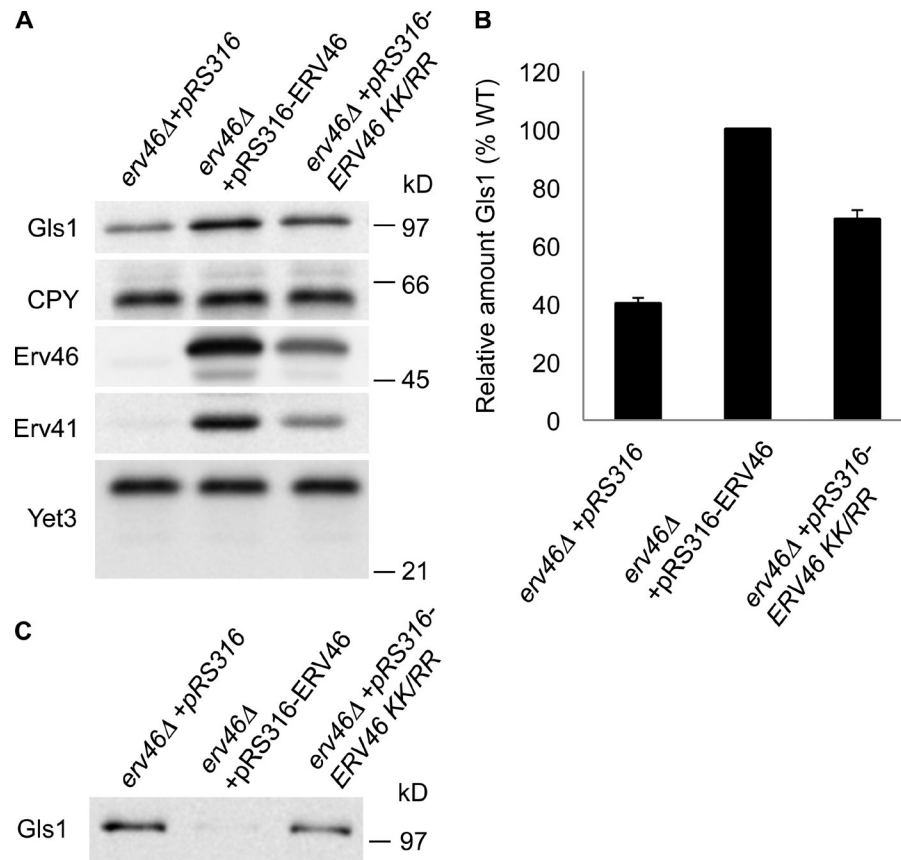

Figure S3. **Mutation of a COPI binding motif in the Erv46 tail mislocalizes Gls1.** (A) Cells grown to mid-log phase were lysed, resolved on a 10.5% polyacrylamide gel, and immunoblotted for Gls1, CPY, Erv46, Erv41, and Yet3 (loading control). *erv46Δ* + pRS316 (CBY4002), *erv46Δ* + pRS316-ERV46 (CBY4003), and *erv46Δ* + pRS316-ERV46 KK/RR (CBY4004) strains were compared. The panel was assembled from a single immunoblot, and the molecular mass markers shown indicate relative positions across neighboring strips. (B) Relative amounts of Gls1 with standard error bars ( $n = 3$ ). Gls1 levels were normalized with Yet3 as the loading control and plotted as a percentage relative to WT. (C) Proteins secreted to the extracellular medium were precipitated, resolved on a polyacrylamide gel, and immunoblotted for Gls1.

Table S1. **Plasmids used in this study**

| Plasmid                                                                                                       | Reference              |
|---------------------------------------------------------------------------------------------------------------|------------------------|
| pYEX4T-1-GLS1 ( <i>URA3</i> 2 $\mu$ plasmid, <i>CUP1</i> promoter for GST-GLS1[33–833] expression)            | This study             |
| pRS425-GLS1 ( <i>LEU2</i> 2 $\mu$ plasmid)                                                                    | This study             |
| pRS317-GLS1 ( <i>LYS2</i> <i>CEN</i> plasmid)                                                                 | This study             |
| pRS317-HA-GLS1 ( <i>LYS2</i> <i>CEN</i> plasmid)                                                              | This study             |
| pGEX2T-FPR2 ( <i>AmpR</i> <i>ori</i> plasmid, <i>tac</i> promoter for Gst-Fpr2 expression in <i>E. coli</i> ) | This study             |
| pRS424-ERV41 ( <i>TRP1</i> 2 $\mu$ plasmid)                                                                   | Otte et al., 2001      |
| pRS426-ERV46 ( <i>URA3</i> 2 $\mu$ plasmid)                                                                   | Otte et al., 2001      |
| pRS316-ERV46 ( <i>URA3</i> <i>CEN</i> plasmid)                                                                | Otte and Barlowe, 2002 |
| pRS316-ERV46-KK/RR ( <i>URA3</i> <i>CEN</i> plasmid)                                                          | This study             |

Table S2. **Primers used in this study**

| Primer         | Sequence                                                                     | Reference         |
|----------------|------------------------------------------------------------------------------|-------------------|
| GLS1-EcoRI     | 5'-GAGATCGAATTCGAAGAATATCAAAGTTC-3'                                          | This study        |
| GLS1-Sall-1    | 5'-CTGCAGGTCGACTCAGAAGCGTCCAAG-3'                                            | This study        |
| GLS1-NotI      | 5'-ATAAGAATGCGGCCGCGAGATTCTGAAGAAGACCCAT-3'                                  | This study        |
| GLS1-Sall-2    | 5'-TCCGAGGCGTCGACTGTGACATTTTATAATGCAT-3'                                     | This study        |
| GLS1-XhoI      | 5'-GAGTCCTCGAGATGCTTATTTCAAATCTAAG-3'                                        | This study        |
| GLS1-IntF      | 5'-ATCCGGAATATGAAACCATGG-3'                                                  | This study        |
| GLS1-IntR      | 5'-AGTGAAGGTACGCCCAACC-3'                                                    | This study        |
| FPR2-BamHI     | 5'-CGGGATCCGGTTCCTGTCTCAGATTTGAAATCGGTATTATC-3'                              | This study        |
| FPR2-EcoRI     | 5'-CGGAATTCCTAGGCGGCTGATTTACGCTACCAATTC-3'                                   | This study        |
| YAL042w-NotI   | 5'-ATAAGAATGCGGCCGCTGCAGATGACATTGCGCTGC-3'                                   | Otte et al., 2001 |
| YAL042w-BamHI  | 5'-CGCGGATCCGCCATGATCTCTCGGGTTGG-3'                                          | Otte et al., 2001 |
| ERV46(KK/RR)-F | 5'-CGATCTGGGGCAGGAGGAGCCAGTAGAGG-3'                                          | This study        |
| ERV46(KK/RR)-R | 5'-CCTTACTGGCTCCTCCTGCCCCAGATCG-3'                                           | This study        |
| ERV46-IntF     | 5'-TAAGGAACAGCACGGGCAG-3'                                                    | This study        |
| ERV46-IntR     | 5'-CCCCTCTGTTCAACAGCAG-3'                                                    | This study        |
| Erv41-KO-F     | 5'-TTTTGCTGTAACGTACAGGCAGAGACTTCAGGAGTATATACGGATCCCCGGGTTAATTAA-3'           | This study        |
| Erv41-KO-R     | 5'-GTTATCTTGGGTATACTGCATTCTCTTTTCTTTTACATATGAATTCGAGCTCGTTAAAC-3'            | This study        |
| Erv46-KO-F     | 5'-GACAGTGATATAACACACATAGCTAGACACAATAGACATCCGGATCCCCGGGTTAATTAA-3'           | This study        |
| Erv46-KO-R     | 5'-AGTATGTAGAAAGGGCTCTCCCTATGACAGTCTCTTCTGAATTCGAGCTCGTTAAAC-3'              | This study        |
| Gls1-KO-F      | 5'-CAACTGTTAATAAGGAAGTAGTGGATAATAACGGTTCAGGTTGCTTCACACGGATCCCCGGGTTAATTAA-3' | This study        |
| Gls1-KO-R      | 5'-ACATATCTGGTACATATCTGTTTATATGACTGAAAATATCTACATAGATGAATTCGAGCTCGTTAAAC-3'   | This study        |

F, forward; R, reverse.

**Table S3 shows the mass spectrometry peptide data for the *erv41Δ* and *erv46Δ* strains from SILAC experiments and proteome changes sorted from smallest to largest  $\log_2$  (*erv41Δ*/control) scores and is provided online in an Excel spreadsheet.**

## References

- Otte, S., and C. Barlowe. 2002. The Erv41p-Erv46p complex: multiple export signals are required in trans for COPII-dependent transport from the ER. *EMBO J.* 21:6095–6104. <http://dx.doi.org/10.1093/emboj/cdf598>
- Otte, S., W.J. Belden, M. Heidtman, J. Liu, O.N. Jensen, and C. Barlowe. 2001. Erv41p and Erv46p: new components of COPII vesicles involved in transport between the ER and Golgi complex. *J. Cell Biol.* 152:503–518. <http://dx.doi.org/10.1083/jcb.152.3.503>
